# Supplementary material for: A transcriptome resource for the koala (Phascolarctos cinereus): insights into koala retrovirus transcription and sequence diversity
Source: PubMed Central journal article supplement (PMC4247155; doi:10.1186/1471-2164-15-786), 2014-09-11
Supplement: 12864_2014_6686_MOESM1_ESM.pdf [file 12864_2014_6686_MOESM1_ESM.pdf]

## **Comparison of assembly with Velvet-Oases and Trinity**

In a first set of pilot assemblies we investigated two different assembly methods (Velvet-Oases and Trinity), each of which used sequence data from a single PC library as input. The Velvet-Oases method was run on eight libraries while Trinity was run on three only. Table S1 shows several descriptive metrics of assembly, including number of transcripts and N50. For Velvet-Oases assemblies the number of transcripts ranged from 87,666 (PC009) to 210,518 (PC001), and N50 ranged from 2,513 (PC004) to 4,161 (PC010). Although these values are not necessarily good indicators of the quality of a transcriptome assembly [R1], we nevertheless note that they are consistent with naive expectations for a marsupial transcriptome. For example, in the Ensembl gene annotation of the opossum, a marsupial with a well-annotated genome (Table 1 in main text), the mean length of 22,310 predicted protein-coding transcripts is 2,595. For the three libraries treated with both assembly methods, Trinity gave similar results to the Velvet-Oases assemblies, although Velvet-Oases produced fewer transcripts and higher N50 values.

We aimed to construct an extensive catalog of koala transcripts and so the number of genes represented is a more pertinent measure of the quality of transcriptome assembly than is N50. Since there is no koala reference genome or transcriptome available for this purpose we used instead sequences from the Tasmanian devil. We used BLAST to align koala transcript sequences to protein products of Tasmanian devil Ensembl genes (Table S1). In the top-scoring alignments from searches with Velvet-Oases transcripts there are between 11,973 (in PC009) and 14,508 (PC008) distinct Tasmanian devil protein sequences, with the corresponding number of genes ranging between 10,959 and 13,108. This rough estimate of

gene coverage indicates that the Velvet-Oases assemblies are successfully reconstructing transcripts from a large number of genes. Analogous BLAST searches with the three sets of transcripts produced by Trinity give comparable numbers of proteins and genes, although in two libraries (PC001 and PC005) these numbers are higher than for Velvet-Oases. However, this relationship is not constant when we take into consideration the length of the alignment. Figure S1 shows the number of distinct Tasmanian devil protein sequences in Velvet-Oases and Trinity PC001 library alignments when various values of an alignment length filter (minimum proportion of subject sequence covered by the alignment) are applied. When this length requirement is 20% or more the number of proteins is higher in Velvet-Oases than in Trinity. A similar situation is seen in the case of PC005 alignments (not shown). This suggests that for our data Velvet-Oases is slightly better than Trinity at reconstructing intact full-length protein coding regions. We conclude that both Velvet-Oases and Trinity give satisfactory and comparable results, but chose to proceed with Velvet-Oases in subsequent assemblies because of its apparent advantage in producing transcripts encoding complete protein sequences.

### **Effect on assembly of digital normalization of input data**

In a second set of assemblies, for three of the PC libraries (as before, PC001, PC005 and PC006) we investigated the effect on Velvet-Oases assembly outcomes of reducing the size of the input data with a digital normalization procedure (which we planned to use on a global assembly). The results (Table S1) show that in comparison with Velvet-Oases assemblies of non-normalized data there were reductions in the number of transcripts, in N50 and in gene coverage again as measured by the number of distinct Tasmanian devil genes represented in

sequence alignments. The size of the reductions varies between libraries, with PC001 being least affected (e.g. the number of Tasmanian devil genes covered in BLAST searching is reduced by only 0.8% to 12,538), while in PC006 the reductions are quite large (e.g. the number of Tasmanian devil genes covered in BLAST searching is reduced by 35% (from 11,707 to 7,585)). We conclude that the normalization is effective but is causing loss of information which is particularly noticeable in PC006. Nevertheless when scaling up the assembly process this potential loss is outweighed by the advantage offered by reduction in computational requirements (because size of input to the assembly program is reduced) and so we used this method to construct our final global (all tissue libraries) assemblies for PC and for Bi.

**Table S1 Koala pilot transcriptome assemblies.**

| Library | Method                                | No. transcripts | Max. length | Mean length | N50  | No. proteins hit <sup>1</sup> | No. genes <sup>2</sup> |
|---------|---------------------------------------|-----------------|-------------|-------------|------|-------------------------------|------------------------|
| PC001   | Trinity                               | 242163          | 22842       | 1208        | 3165 | 14435                         | 13334                  |
|         | Velvet-Oases                          | 210518          | 23408       | 1851        | 3424 | 14065                         | 12651                  |
|         | digital normalization<br>Velvet-Oases | 133329          | 22850       | 1741        | 3139 | 13892                         | 12538                  |
| PC004   | Velvet-Oases                          | 100884          | 26585       | 1485        | 2513 | 12012                         | 10960                  |
| PC005   | Trinity                               | 138927          | 22777       | 1140        | 2796 | 13130                         | 12225                  |
|         | Velvet-Oases                          | 118557          | 22704       | 1904        | 3291 | 13141                         | 11995                  |
|         | digital normalization<br>Velvet-Oases | 89660           | 21425       | 1645        | 2886 | 12838                         | 11911                  |
| PC006   | Trinity                               | 157396          | 18583       | 1103        | 2769 | 11624                         | 10837                  |
|         | Velvet-Oases                          | 122763          | 22043       | 1868        | 3203 | 12830                         | 11707                  |
|         | digital normalization<br>Velvet-Oases | 42624           | 12711       | 978         | 1604 | 8086                          | 7585                   |
| PC008   | Velvet-Oases                          | 180514          | 23671       | 2050        | 3642 | 14508                         | 13108                  |
| PC009   | Velvet-Oases                          | 87666           | 89224       | 1689        | 3042 | 11973                         | 10959                  |
| PC010   | Velvet-Oases                          | 147527          | 31170       | 2298        | 4161 | 14204                         | 12994                  |
| PC011   | Velvet-Oases                          | 124433          | 22391       | 2136        | 3754 | 13367                         | 12183                  |

1. Total number of distinct protein sequences in best-hit translated BLAST alignments of koala transcripts with Ensembl Tasmanian devil proteins.
2. Total number of distinct Tasmanian devil genes.

**Figure S1**

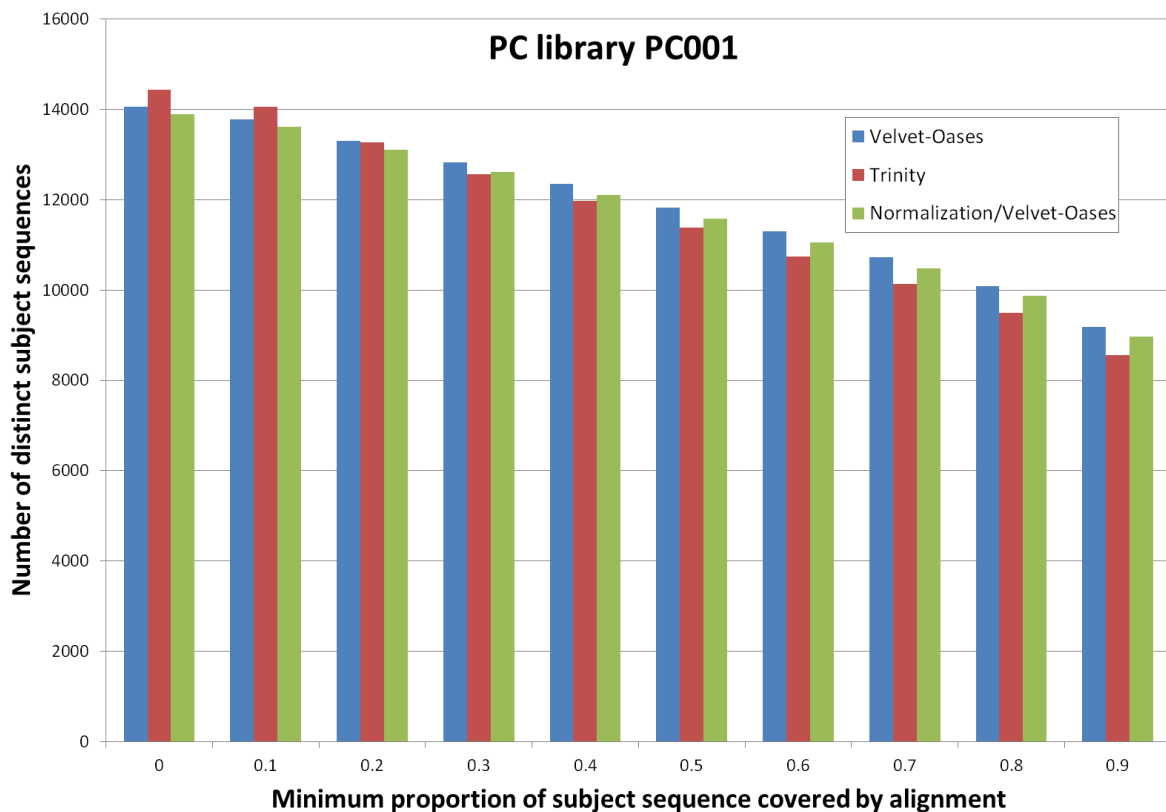

Number of protein sequences found by translated BLAST similarity searching with transcripts produced by three transcriptome assembly procedures. Koala transcript sequences from assemblies of a representative library (PC\_0001; spleen) were used to query Tasmanian devil protein sequences and the top hit was retained. The number of distinct subject sequences is shown for a range of minimum alignment length constraints.

## References

R1. Baker M: **De novo genome assembly: what every biologist should know.** *Nat Meth* 2012, 9(4):333-337.
