# Supplementary material for: A transcriptome resource for the koala (Phascolarctos cinereus): insights into koala retrovirus transcription and sequence diversity
Source: PubMed Central journal article supplement (PMC4247155; doi:10.1186/1471-2164-15-786), 2014-09-11
Supplement: 12864_2014_6686_MOESM6_ESM.pdf [file 12864_2014_6686_MOESM6_ESM.pdf]

qm 185823 1 MSSAARTL--PATVLGAMEMGWRMDQASSSEASMQAF LDRGHREVDTA FVYGDGQSES FLGSM DLGLKDGSKGVKIATKAIP 79  
m 182015 1 MSSAARTQDRPGTVLGAMEMGWRMDLAASKVCMQAF LDRGYREVDTAHY YGEGQSES FLGSM DLGLKDGSKGVKIATKAIP 81  
qm 185847 1 MSSAARTQDRPGTVLGAMEMGWRMDLAASKVCMQAF LDRGYREVDTAHY YGEGQSES FLGSM DLGLKDGSKGVKIATKANP 81  
qm 185832 1 MSSAARTL--PATVLGAMEMGWRMDQASSSEASMQAF LDRGHREVDTA FVYGDGQSES FLGSM DLGLKDGSKGVKIATKAIP 79  
m 182017 1 MSSAARTQDRPGTVLGAMEMGWRMDLAASKVCMQAF LDRGYREVDTAHY YGEGQSES FLGSM DLGLKDGSKGVKIATKAIP 81  
m 182026 1 MSSTARTQDRPATVLGAMEIGWSMDLAASKVCMQAF LDRGYREVDTAHY YGEGQSES FLGSM DLGLKDGSKGVKIATKAIP 81  
m 182005 1 MSSTARTQDRPATVLGAMEIGWSMDLAASKVCMQAF LDRGYREVDTAHY YGEGQSES FLGSM DLGLKDGSKGVKIATKAIP 81  
m 182014 1 MSSAARTQDRPGTVLGAMEMGWRMDLAASKVCMQAF LDRGYREVDTAHY YGEGQSES FLGSM DLGLKDGSKGVKIATKAIP 81  
qm 185830 1 MSSAARTQDRPGTVLGAMEMGWRMDLAASKVCMQAF LDRGYREVDTAHY YGEGQSES FLGSM DLGLKDGSKGVKIATKANP 81  
m 182043 1 MSSAARTQDRPGTVLGAMEMGWRMDLAASKVCMQAF LDRGYREVDTAHY YGEGQSES FLGSM DLGLKDGSKGVKIATKAIP 81  
m 182009 1 MSSTARTQDRPATVLGAMEIGWSMDLAASKVCMQAF LDRGYREVDTAHY YGEGQSES FLGSM DLGLKDGSKGVKIATKAIP 81  
qm 185822 1 MSSAARTQDRPGTVLGAMEMGWRMDLAASKVCMQAF LDRGYREVDTAHY YGEGQSES FLGSM DLGLKDGSKGVKIATKAIP 81  
qm 185829 1 MSSTARTQDRPATVLGAMEIGWSMDLAASKVCMQAF LDRGYREVDTAHY YGEGQSES FLGSM DLGLKDGSKGVKIATKAIP 81  
qm 185839 1 MSSAARTL--PATVLGAMEMGWRMDQASSSEASMQAF LDRGHREVDTA FVYGDGQSES FLGSM DLGLKDGSKGVKIATKAIP 79  
qm 185811 1 MSSAARTL--PATVLGAMEMGWRMDQASSSEASMQAF LDRGHREVDTA FVYGDGQSES FLGSM DLGLKDGSKGVKIATKAIP 79

qm 185823 80 MDGKTL SASSVRFQLETS LKRLQCN RVDLFY LHMPDHNT PVEETLQACNE LHKEGKFVE LGLSNYASWEVAE ICTLCKKNG 160  
m 182015 82 MDGKTL SASSVRSQLETS LKRLQC PKVDLFY LHFDPHVTP I EETLEACNE LHKEGKFVE LGLSNYASWEVAE ICTLCTNSG 162  
qm 185847 82 LDGKTL SASSVRSQLETS LKRLQC PKVDLFY LHFDPHVTP I EETLEACNE LHKEGKFVE LGLSNYASWEVAE ICTLCKKNG 162  
qm 185832 80 MDGKTL SASSVRFQLETS LKRLQCN RVDLFY LHMPDHNT PVEETLQACNE LHKEGKFVE LGLSNYASWEVAE ICTLCTNSG 160  
m 182017 82 MDGKTL SASSVRFQLETS LKRLQCN RVDLFY LHMPDHNT PVEETLQACNE LHKEGKFVE LGLSNYASWEVAE ICTLCTNSG 162  
m 182026 82 MDGKTL SASSVRFQLETS LKRLQCN RVDLFY LHMPDHNT PVEETLQACNE LHKEGKFVE LGLSNYASWEVAE ICTLCTNSG 162  
m 182005 82 MDGKTL SASSVRFQLETS LKRLQCN RVDLFY LHMPDHNT PVEETLQACNE LHKEGKFVE LGLSNYASWEVAE ICTLCTNSG 162  
m 182014 82 MDGKTL SASSVRFQLETS LKRLQCN RVDLFY LHMPDHNT PVEETLQACNE LHKEGKFVE LGLSNYASWEVAE ICTLCTNSG 162  
qm 185830 82 LDGKTL SASSVRSQLETS LKRLQC PKVDLFY LHFDPHVTP I EETLEACNE LHKEGKFVE LGLSNYASWEVAE ICTLCTNSG 162  
m 182043 82 MDGKTL SASSVRFQLETS LKRLQCN RVDLFY LHMPDHNT PVEETLQACNE LHKEGKFVE LGLSNYASWEVAE ICTLCTNSG 162  
m 182009 82 MDGKTL SASSVRFQLETS LKRLQCN RVDLFY LHMPDHNT PVEETLQACNE LHKEGKFVE LGLSNYASWEVAE ICTLCTNSG 162  
qm 185822 82 MDGKTL SASSVRFQLETS LKRLQCN RVDLFY LHMPDHNT PVEETLQACNE LHKEGKFVE LGLSNYASWEVAE ICTLCTNSG 162  
qm 185829 82 MDGKTL SASSVRFQLETS LKRLQCN RVDLFY LHMPDHNT PVEETLQACNE LHKEGKFVE LGLSNYASWEVAE ICTLCTNSG 162  
qm 185839 80 MDGKTL SASSVRFQLETS LKRLQCN RVDLFY LHMPDHNT PVEETLQACNE LHKEGKFVE LGLSNYASWEVAE ICTLCTNSG 160  
qm 185811 80 MDGKTL SASSVRFQLETS LKRLQCN RVDLFY LHMPDHNT PVEETLQACNE LHKEGKFVE LGLSNYASWEVAE ICTLCTNSG 160

qm 185823 161 WWLPTVYQGMYS AIDRQVEKELFPCLRH YGLRFYVYS PLAGGF LTGKY KYEDKDKKQP ITRFFGRRVSQLY HKRYWKVLHF 241  
m 182015 163 WWLPTVYQGMYNAT TRQVETELFPCLH HYGLRFYVYS PLAGGF LTGKY KYEDKDKKQP ITRFFGRRVSQLY HKRYWKVLHF 243  
qm 185847 163 WWLPTVYQGMYS AIDRQVEKELFPCLRH YGLRFYVYS PLAGGF LTGKY KYEDKDKKQP ITRFFGRRVSQLY HKRYWKVLHF 243  
qm 185832 161 WWLPTVYQGMYNAT TRQVETELFPCLH HYGLRFYAYNP LAGGL LTGKY RYEDKDKKQPEGRFFGNSWAET YRNRFWKEHHF 241  
m 182017 163 WWLPTVYQGMYNAT TRQVETELFPCLH HYGLRFYAYNP LAGGL LTGKY RYEDKDKKQPEGRFFGNSWAET YRNRFWKEHHF 243  
m 182026 163 WWLPTVYQGMYNAT TRQVETELFPCLH HYGLRFYAYNP LAGGL LTGKY RYEDKDKKQPEGRFFGNSWAET YRNRFWKEHHF 243  
m 182005 163 WWLPTVYQGMYNAT TRQVETELFPCLH RFGLRFYAFNP LAGGL LTGKY TYEDKDKNOPTGRFFGKNLSE IYRNR YWKKHHF 243  
m 182014 163 WWLPTVYQGMYNAT TRQVETELFPCLH RFGLRFYAFNP LAGGL LTGKY TYEDKDKNOPTGRFFGKNLSE IYRNR YWKKHHF 243  
qm 185830 163 WWLPTVYQGMYNAT TRQVETELFPCLH RFGLRFYAFNP LAGGL LTGKY NYEDEDKQPRGRFFQRDFSEHYRNR YWKKHHF 243  
m 182043 163 WWLPTVYQGMYNAT TRQVETELFPCLH HYGLRFYAYNP LAGGL LTGKY NYEDEDKQPRGRFFQRDFSEHYRNR YWKKHHF 243  
m 182009 163 WWLPTVYQGMYNAT TRQVETELFPCLH HYGLRFYAYNP LAGGL LTGKY NYEDEDKQPRGRFFQRDFSEHYRNR YWKKHHF 243  
qm 185822 163 WWLPTVYQGMYNAT TRQVETELFPCLH RFGLRFYAFNP LAGGL LTGKY NYEDEDKQPRGRFFQRDFSEHYRNR YWKKHHF 243  
qm 185829 163 WWLPTVYQGMYNAT TRQVETELFPCLH RFGLRFYAFNP LAGGL LTGKY NYEDEDKQPRGRFFQRDFSEHYRNR YWKKHHF 243  
qm 185839 161 WWLPTVYQGMYNAT TRQVETELFPCLH RFGLRFYAFNP LAGGL LTGKY TYEDKDKNOPTGRFFGKNLSE IYRNR YWKKHHF 241  
qm 185811 161 WWLPTVYQGMYNAT TRQVETELFPCLH RFGLRFYAFNP LAGGL LTGKY NYEDEDKQPRGRFFQRDFSEHYRNR YWKKHHF 241

qm 185823 242 QAIDLVRKALAA SYGANPPSMTSAALR WMYHHSQIQGARGDAV I LGMTS LEQLQQNLAAAEEGPLEPGVVKAFDDAWN LVA 322  
m 182015 244 QAIDLVRKALAA SYGANPPSMTSAALR WMYHHSKLQGAHGDAV I LGMTS LEQLQQNLAAAEEGPLEPGVVKAFDDAWN LVA 324  
qm 185847 244 QAIDLVRKALAA SYGANPPSMTSAALR WMYHHSQIQGARGDAV I LGMTS LEQLQQNLAAAEEGPLEPGVVKAFDDAWN LVA 324  
qm 185832 242 QAISLVKKALAA SYGASPPSMTSAALR WMYHHSKLQGAHGDAV I LGMTS LEQLQQNLAAAEEGPLEPGVVKAFDDAWN LVA 322  
m 182017 244 QAISLVKKALAA SYGASPPSMTSAALR WMYHHSKLQGAHGDAV I LGMTS LEQLQQNLAAAEEGPLEPGVVKAFDDAWN LVA 324  
m 182026 244 QAISLVKKALAA SYGASPPSMTSAALR WMYHHSKLQGAHGDAV I LGMTS LEQLQQNLAAAEEGPLEPGVVKAFDDAWN LVA 324  
m 182005 244 QAIDLVRKALAA SYGASPPSMTSAALR WMYHHSKLQGAHGDAV I LGMTS LEQLQQNLAAAEEGPLEPGVVKAFDDAWN LVA 324  
m 182014 244 QAIDLVRKALAA SYGASPPSMTSAALR WMYHHSKLQGAHGDAV I LGMTS LEQLQQNLAAAEEGPLEPGVVKAFDDAWN LVA 324  
qm 185830 244 QAIDLVRKALAA SYGASPPSMTSAALR WMYHHSKLQGAHGDAV I LGMTS LEQLQQNLAAAEEGPLEPGVVKAFDDAWN LVA 324  
m 182043 244 QAIDLVRKALAA SYGASPPSMTSAALR WMYHHSKLQGAHGDAV I LGMTS LEQLQQNLAAAEEGPLEPGVVKAFDDAWN LVA 324  
m 182009 244 QAIDLVRKALAA SYGASPPSMTSAALR WMYHHSKLQGAHGDAV I LGMTS LEQLQQNLAAAEEGPLEPGVVKAFDDAWN LVA 324  
qm 185822 244 QAIDLVRKALAA SYGASPPSMTSAALR WMYHHSKLQGAHGDAV I LGMTS LEQLQQNLAAAEEGPLEPGVVKAFDDAWN LVA 324  
qm 185829 244 QAIDLVRKALAA SYGASPPSMTSAALR WMYHHSKLQGAHGDAV I LGMTS LEQLQQNLAAAEEGPLEPGVVKAFDDAWN LVA 324  
qm 185839 242 KAIDLVRKALAA CYETDPPSMTSAALR WMYHHSKLQGAHGDAV I LGMTS LEQLQQNLAAAEEGPLEPGVVKAFDDAWN LVA 322  
qm 185811 242 QAIDLVRKALAA SYGASPPSMTSAALR WMYHHSKLQGAHGDAV I LGMTS LEQLQQNLAAAEEGPLEPGVVKAFDDAWN LVA 322

qm 185823 323 HECPSYFR 330  
m 182015 325 HECPSYFR 332  
qm 185847 325 HECPSYFR 332  
qm 185832 323 HECPSYFR 330  
m 182017 325 HECPSYFR 332  
m 182026 325 HECPSYFR 332  
m 182005 325 HECPSYFR 332  
m 182014 325 HECPSYFR 332  
qm 185830 325 HECPSYFR 332  
m 182043 325 HECPSYFR 332  
m 182009 325 HECPSYFR 332  
qm 185822 325 HECPSYFR 332  
qm 185829 325 HECPSYFR 332  
qm 185839 323 HECPSYFR 330  
qm 185811 323 HECPSYFR 330
