# Supplementary material for: A transcriptome resource for the koala (Phascolarctos cinereus): insights into koala retrovirus transcription and sequence diversity
Source: PubMed Central journal article supplement (PMC4247155; doi:10.1186/1471-2164-15-786), 2014-09-11
Supplement: 12864_2014_6686_MOESM8_ESM.pdf [file 12864_2014_6686_MOESM8_ESM.pdf]

qm 31459 1 MGQGESTPLSLTLDHWKDVKTRAHNLSVEIRKGGKWQTFCSSEWPTFEVGWPPEGT FNPSI 60  
11036\_composi te 1 MGQGESTPLSLTLDHWKDVKTRAHNLSVEIRKGGKWQTFCSSEWPTFEVGWPPEGT FNPSI 60  
AAF15097 1 MGQGESTPLSLTLDHWKDVKTRAHNLSVEIRKGGKWQTFCSSEWPTFEVGWPPEGT FNPSI 60  
qm 31546 1 MGQGESTPLSLTLDHWKDVKTRAHNLSVEIRKGGKWQTFCSSEWPTFEVGWPPEGT FNPSI 60

qm 31459 61 ISAVKRIVFQETGGHPDQVPYIIVWQDLSNSPPPWV PPLAKI AVASGQDNGRKSAGGRPS 120  
11036\_composi te 61 ISAVKRIVFQETGGHPDQVPYIIVWQDLSNSP - - - - PPLAKI AVASGQDNGRKSAGGRPS 116  
AAF15097 61 ISAVKRIVFQETGGHPDQVPYIIVWQDLSNSPPPWV PPLAKI AVASGQDNGRKSAGGRPS 120  
qm 31546 61 ISAVKRIVFQETGGHPDQVPYIIVWQDLSNSPPPWV PPLAKI AVASGQDNGRKSAGGRPS 120

qm 31459 121 APSRLPIYPETDSLFLLESEPPPY - - - - - PPAPHA V R P P P P G L M A E G L G S E G P A A G T R S R R 174  
11036\_composi te 117 APSRLPIYPETDSLFLLESEPPPYPTSPPP PPAPHA A R P A P G L M A E G L G S E G P A A G T R S R R 176  
AAF15097 121 APSRLPIYPETDSLFLLESEPPPYPTSPPP PPAPHA A R P A P G L M A E G L G S E G P A A G T R S R R 180  
qm 31546 121 APSRLPIYPETDSLFLLESEPPPYPTSPPP PPAPHA A R P A P G R M A E G L G S E G P A A G T R S R R 180

qm 31459 175 PRSPTGDTGPDSTVALPLRAVGPPAEPNGLVPLQYWPFSSADLYNWKSNHPSFSENPTGL 234  
11036\_composi te 177 PRSPTGDTGPDSTVALPLRAVGPPAEPNGLVPLQYWPFSSADLYNWKSNHPSFSENPTGL 236  
AAF15097 181 PRSPTGDTGPDSTVALPLRAVGPPAEPNGLVPLQYWPFSSADLYNWKSNHPSFSENPTGL 240  
qm 31546 181 PRSPTGDTGPDSTVALPLRAVGPPAEPNGLVPLQYWPFSSADLYNWKSNHPSFSENPTGL 240

qm 31459 235 TGLLES LMFSHQPTWDDCQQLLQVLF TTEERERILLEARKNVLGVNGAPTQLENLINEAF 294  
11036\_composi te 237 TGLLES LMFSHQPTWDDCQQLLQVLF TTEERERILLEARKNVLGVNGAPTQLENLINEAF 296  
AAF15097 241 TGLLES LMFSHQPTWDDCQQLLQVLF TTEERERILLEARKNVLGVNGAPTQLENLINEAF 300  
qm 31546 241 TGLLES LMFSHQPTWDDCQQLLQVLF TTEERERILLEARKNVLGVNGAPTQLENLINEAF 300

qm 31459 295 PLNRPQWDHNTAEGRERLLVYRRTL VAGLKGAAARRPTNLAKVREVLQGPTEPPSVFLERL 354  
11036\_composi te 297 PLNRPQWDHNTAEGRERLLVYRRTL VAGLKGAAARRPTNLAKVREVLQGPTEPPSVFLERL 356  
AAF15097 301 PLNRPQWDHNTAEGRERLLVYRRTL VAGLKGAAARRPTNLAKVREVLQGPTEPPSVFLERL 360  
qm 31546 301 PLNRPQWDHNTAEGRERLLVYRRTL VAGLKGAAARRPTNLAKVREVLQGPTEPPSVFLERL 360

qm 31459 355 MEAYRRYT PFDPSSEGQKAAVAMSF IGQSAPDIKKKLQRLEGLQDHS LQDLIKEAEKVYH 414  
11036\_composi te 357 MEAYRRYT PFDPSSEGQKAAVAMSF IGQSAPDIKKKLQRLEGLQDHS LQDLIKEAEKVYH 416  
AAF15097 361 MEAYRRYT PFDPSSEGQKAAVAMSF IGQSAPDIKKKLQRLEGLQDHS LQDLIKEAEKVYH 420  
qm 31546 361 MEAYRRYT PFDPSSEGQKAAVAMSF IGQSAPDIKKKLQRLEGLQDHS LQDLIKEAEKVYH 420

qm 31459 415 KRETEEEKQEREKKETEERERRRDRRQEKNLTKILAAVVSEKGS RGRQAGNLSNRAMRAP 474  
11036\_composi te 417 KRETEEEKQEREKKETEERERERQRDRRQEKNLTKILAAVVSEKGS RGRQAGNLSNRAMRAP 476  
AAF15097 421 KRETEEEKQEREKKETEERERRRDRRQEKNLTKILAAVVSEKGF RGRQAGNLSNRAMRAP 480  
qm 31546 421 KRETEEEKQEREKKETEERERRRDRRQEKNLTKILAAVVSEKGS RGRQAGNLSNRAMRAP 480

qm 31459 475 REGRPP LDKDQCA YCKERGHWARECPRKKNARETNVLT LGD 515  
11036\_composi te 477 REGRPP LDKDQCA YCKERGHWARECPRKKNARETNVLT LGD 517  
AAF15097 481 REGRPP LDKDQCA YCKERGHWARECPRKKNARETNVLT LGD 521  
qm 31546 481 REGRPP LDKDQCA YCKERGHWARECPRKKNARETNVLT LGD 521
