# Supplementary material for: A transcriptome resource for the koala (Phascolarctos cinereus): insights into koala retrovirus transcription and sequence diversity
Source: PubMed Central journal article supplement (PMC4247155; doi:10.1186/1471-2164-15-786), 2014-09-11
Supplement: 12864_2014_6686_MOESM9_ESM.pdf [file 12864_2014_6686_MOESM9_ESM.pdf]

|          |      |                                                                      |      |
|----------|------|----------------------------------------------------------------------|------|
| m 17776  | 1    | MGKMGPKRTVVAGATGSKVYPWTTKRL LKIGQKQVTHSFLVIPECPAPLLGRDLLTKLKA        | 60   |
| qm 31553 | 1    | MGKMGPKRTVVAGATGSKVYPWTTKRL LKIGQKQVTHSFLVIPECPAPLLGRDLLTKLKA        | 60   |
| AAF15098 | 1    | MGKMGSKRTVVAGATGSKVYPWTTKRL LKIGQKQVTHSFLVIPECPAPLLGRDLLTKLKA        | 60   |
| m 17776  | 61   | QIQFSTEGPQVTWEDHPAMCLVLNLEEEYRLHEKPVPPSIDPSWLQLFPMVWAEKAGMGL         | 120  |
| qm 31553 | 61   | QIQFSTEGPQVTWGDHPAMCLVLNLEEEYRLHEKPVPPSIDPSWLQLFPMVWAEKAGMGL         | 120  |
| AAF15098 | 61   | QIQFSTEGPQVTWEDHPAMCLVLNLEEEYRLHEKPVPPSIDPSWLQLFPMVWAEKAGMGL         | 120  |
| m 17776  | 121  | ANQVPPVVVELKSDASPVAVRQYPMSKEAREGIRPHIQRFLDLGILVPCQSPWNTPLLPV         | 180  |
| qm 31553 | 121  | ANQVPPVVVELKSDASPVAVRQYPMSKEAREGIRPHIQRFLDLGILVPCQSPWNTPLLPV         | 180  |
| AAF15098 | 121  | ANQVPPVVVELKSDASPVAVRQYPMSKEAREGIRPHIQRFLDLGILVPCQSPWNTPLLPV         | 180  |
| m 17776  | 181  | KKPGTNDYRPVQDLREVNKRVDIHPTVPNPYNLLSSLPPSHTWYSVLDLKDAFFCLKLH          | 240  |
| qm 31553 | 181  | KKPGTNDYRPVQDLREVNKRVDIHPTVPNPYNLLSSLPPSHTWYSVLDLKDAFFCLKLH          | 240  |
| AAF15098 | 181  | KKPGTNDYRPVQDLREVNKRVDIHPTVPNPYNLLSSLPPSHTWYSVLDLKDAFFCLKLH          | 240  |
| m 17776  | 241  | PNSQPLFAFEWRDPEKGNTGQLTWTRLPQGFKNSTLFDEALHRDLASFRALNPQVVMLQ          | 300  |
| qm 31553 | 241  | PNSQPLFAFEWRDPEKGNTGQLTWTRLPQGFKNSTLFDEALHRDLASFRALNPQVVMLQ          | 300  |
| AAF15098 | 241  | PNSQPLFAFEWRDPEKGNTGQLTWTRLPQGFKNSTLFDEALHRDLASFRALNPQVVMLQ          | 300  |
| m 17776  | 301  | YVDDLVAAPTYRDCKEGTRRL LQELSKLGYRVS AKKAQLCREEVTY LGYLLKGGKRWLT       | 360  |
| qm 31553 | 301  | YVDDLVAAPTYRDCKEGTRRL LQELSKLGYRVS AKKAQLCREEVTY LGYLLKGGKRWLT       | 360  |
| AAF15098 | 301  | YVDDLVAAPTYRDCKEGTRRL LQELSKLGYRVS AKKAQLCREEVTY LGYLLKGGKRWLT       | 360  |
| m 17776  | 361  | PARKATVMK IPTPTTPRQVREF LGTAGFCRLWIPGFASLAAPLYPLTREKVPFTWTEAHQ       | 420  |
| qm 31553 | 361  | PARKATVMK IPTPTTPRQVREF LGTAGFCRLWIPGFASLAAPLYPLTREKVPFTWTEAHQ       | 420  |
| AAF15098 | 361  | PARKATVMK IPTPTTPRQVREF LGTAGFCRLWIPGFASLAAPLYPLTREKVPFTWTEAHQ       | 420  |
| m 17776  | 421  | EAFGRIKEALLSAPALALPDLTKPFALYVDEKEGVARGVLTQT LGPWRRPVAYLSKKLDP        | 480  |
| qm 31553 | 421  | EAFGRIKEALLSAPALALPDLTKPFALYVDEKEGVARGVLTQT LGPWRRPVAYLSKKLDP        | 480  |
| AAF15098 | 421  | EAFGRIKEALLSAPALALPDLTKPFALYVDEKEGVARGVLTQT LGPWRRPVAYLSKKLDP        | 480  |
| m 17776  | 481  | VASGWPTCLKAI AAVALLKDADKLT LGQNVLV IAPHNLESIVRQPPDRWMTNARMTHYQ       | 540  |
| qm 31553 | 481  | VASGWPTCLKAI AAVALLKDADKLT LGQNVLV IAPHNLESIVRQPPDRWMTNARMTHYQ       | 540  |
| AAF15098 | 481  | VASGWPTCLKAI AAVALLKDADKLT LGQNVLV IAPHNLESIVRQPPDRWMTNARMTHYQ       | 540  |
| m 17776  | 541  | SLLLNERVSFAPPA I LNPATLLPVESDDTP IHICSE I LAEETGTRPD LRDQPLPGVPAWY   | 600  |
| qm 31553 | 541  | SLLLNERVSFAPPA I LNPATLLPVESDDTP IHICSE I LAEETGTRPD LRDQPLPGVPAWY   | 600  |
| AAF15098 | 541  | SLLLNERVSFAPPA I LNPATLLPVESDDTP IHICSE I LAEETGTRPD LRDQPLPGVPAWY   | 600  |
| m 17776  | 601  | TDGSSFIMDGRRQAGAA IVDNKRTVWASNLP EG TSAQKAEL IALTQALRLAEGKSI NIYT    | 660  |
| qm 31553 | 601  | TDGSSFIMDGRRQAGAA IVDNKRTVWASNLP EG TSAQKAEL IALTQALRLAEGKSI NIYT    | 660  |
| AAF15098 | 601  | TDGSSFIMDGRRQAGAA IVDNKRTVWASNLP EG TSAQKAEL IALTQALRLAEGKSI NIYT    | 660  |
| m 17776  | 661  | DSRYAFATAHVHGA IYKQRGLLTSAGKDIKNKEE I LALLEA I HLPKRVA I HC PGHQ RGT | 720  |
| qm 31553 | 661  | DSRYAFATAHVHGA IYKQRGLLTSAGKDIKNKEE I LALLEA I HLPKRVA I HC PGHQ RGT | 720  |
| AAF15098 | 661  | DSRYAFATAHVHGA IYKQRGLLTSAGKDIKNKEE I LALLEA I HLPKRVA I HC PGHQ RGT | 720  |
| m 17776  | 721  | DPVATGNRKADEAAKQAAQSTR I LTETTKNQEP FEPTRGK I KPRELTP NQGREF I QRLHQ | 780  |
| qm 31553 | 721  | DPVATGNRKADEAAKQAAQSTR I LTETTKNQEH FEPTRGK I KPRELTP DQGREF L QRLHQ | 780  |
| AAF15098 | 721  | DPVATGNRKADEAAKQAAQSTR I LTETTKNQEH FEPTRGK I KPRELTP DQGREF I QRLHQ | 780  |
| m 17776  | 781  | LTHLGPDKLLQLVGRTSFH I PNLQSVVRE I TSKCQVCAVTNAVTTYRESGRRQRGDRPGV     | 840  |
| qm 31553 | 781  | LTHLGPDKLLQLVGRTSFH I PNLQSVVRE I TSKCQVCAVTNAVTTYRESGRRQRGDRPGV     | 840  |
| AAF15098 | 781  | LTHLGPDKLLQLVGRTSFH I PNLQSVVRE I TSKCQVCAVTNAVTTYREP GRRQRGDRPGV    | 840  |
| m 17776  | 841  | YWEVDFTEVKPGRYGNRYLLVF IDTFSGWWEAFPTKTETALT VCKK I LEE I LPRFG I PKV | 900  |
| qm 31553 | 841  | YWEVDFTEVKPGRYGNRYLLVF IDTFSGWWEAFPTKTETALT VCKK I LEE I LPRFG I PKV | 900  |
| AAF15098 | 841  | YWEVDFTEVKPGRYGNRYLLVF IDTFSGWWEAFPTKTETALT VCKK I LEE I LPRFG I PKV | 900  |
| m 17776  | 901  | LGSDNGPAFVAQVSQGLATQLG I NWK LHCA YRPQSSGQVERMNRT I KET LTKLALETGGK  | 960  |
| qm 31553 | 901  | LGSDNGPAFVAQVSQGLATQLG I NWK LHCA YRPQSSGQVERMNRT I KET LTKLALETGGK  | 960  |
| AAF15098 | 901  | LGSDNGPAFVAQVSQGLATQLG I DWK LHCA YRPQSSGQVERMNRT I KET LTKLALETGGK  | 960  |
| m 17776  | 961  | DWVTLLPLALLRARNTPGQFGLTPYE I LHGGPPV LASGEVVG SNGDFFPVLFTHLKALE      | 1020 |
| qm 31553 | 961  | DWVTLLPLALLRARNTPGQFGLTPYE I LHGGPPV LASGEVVG SNGDFFPVLFTHLKALE      | 1020 |
| AAF15098 | 961  | DWVTLLPLALLRARNTPGQFGLTPYE I LHGGPPV LASGEVVG SNGDFFPVLFTHLKALE      | 1020 |
| m 17776  | 1021 | VVRTQ IWDQ I KEAYRPGTVA I PHPFQVGDRVLVRRHRSGSLEPRWKGPYLVLLTTPTAVK    | 1080 |
| qm 31553 | 1021 | VVRTQ IWDQ I KEAYRPGTVA I PHPFQVGDRVLVRRHRSGSLEPRWKGPYLVLLTTPTAVK    | 1080 |
| AAF15098 | 1021 | VVRTQ IWDQ I KEAYRPGTVA I PHPFQVGDRVLVRRHRSGSLEPRWKGPYLVLLTTPTAVK    | 1080 |
| m 17776  | 1081 | VDG IAAVW HASHLKP APPGAPDESWE LEKTDHPLKLRVRRRRNESTA                  | 1127 |
| qm 31553 | 1081 | VDG IAAVW HASHLKP APPGAPDESWE LEKTDHPLKLRVRRRRNESTA                  | 1127 |
| AAF15098 | 1081 | VDG IAAVW HASHLKP APPGAPDESWE LEKTDHPLKLRVRRRRNESTA                  | 1127 |
