# Supplementary material for: A transcriptome resource for the koala (Phascolarctos cinereus): insights into koala retrovirus transcription and sequence diversity
Source: PubMed Central journal article supplement (PMC4247155; doi:10.1186/1471-2164-15-786), 2014-09-11
Supplement: 12864_2014_6686_MOESM10_ESM.pdf [file 12864_2014_6686_MOESM10_ESM.pdf]

PC006\_v2\_3\_comp1\_c0\_seq7 1 MLLISNPRHLGHPMSPGNWKRLIILLSCVFGGAEMNQHHNPHQPMTLTWQVLSQTGSVVWEKKAVEPPWTWWPSLEPDV 80  
PC010\_v2\_3\_comp0\_c0\_seq2 1 MLLISNPRHLGHPMSPGNWKRLIILLSCVFGGAEMNQHHNPHQPMTLTWQVLSQTGSVVWEKKAVEPPWTWWPSLEPDV 80  
ki dney\_v2\_3\_comp22\_c0\_seq1 1 MLLISNPRHLGHPMSPGNWKRLIILLSCVFGGAEMNQHHNPHQPMTLTWQVLSQTGSVVWEKKAVEPPWTWWPSLEPDV 80  
PC009b\_v2\_3\_comp2\_c0\_seq3 1 MLLISNPRHLGHPMSPGNWKRLIILLSCVFGGAEMNQHHNPHQPMTLTWQVLSQTGSVVWEKKAVEPPWTWWPSLEPDV 80  
PC008\_v2\_3\_comp5\_c0\_seq12 1 MLLISNPRHLGHPMSPGNWKRLIILLSCVFGGAEMNQHHNPHQPMTLTWQVLSQTGSVVWEKKAVEPPWTWWPSLEPDV 80  
PC005\_v2\_3\_comp6\_c0\_seq3 1 MLLISNPRHLGHPMSPGNWKRLIILLSCVFGGAEMNQHHNPHQPMTLTWQVLSQTGSVVWEKKAVEPPWTWWPSLEPDV 80

PC006\_v2\_3\_comp1\_c0\_seq7 81 CALVAGLESWDIPELTASASQQARPPDSNYEHAYNQITWGT LGCSYPRARTR IARSQFYVCPRDGRS LSEARRCGGLES L 160  
PC010\_v2\_3\_comp0\_c0\_seq2 81 CALVAGLESWDIPELTASASQQARPPDSNYEHAYNQITWGT LGCSYPRARTR IARSQFYVCPRDGRS LSEARRCGGLES L 160  
ki dney\_v2\_3\_comp22\_c0\_seq1 81 CALVAGLESWDIPELTASASQQARPPDSNYEHAYNQITWGT LGCSYPRARTR IARSQFYVCPRDGRS LSEARRCGGLES L 160  
PC009b\_v2\_3\_comp2\_c0\_seq3 81 CALVAGLESWDIPELTASASQQARPPDSNYEHAYNQITWGT LGCSYPRARTR IARSQFYVCPRDGRS LSEARRCGGLES L 160  
PC008\_v2\_3\_comp5\_c0\_seq12 81 CALVAGLESWDIPELTASASQQARPPDSNYEHAYNQITWGT LGCSYPRARTR IARSQFYVCPRDGRS LSEARRCGGLES L 160  
PC005\_v2\_3\_comp6\_c0\_seq3 81 CALVAGLESWDIPELTASASQQARPPDSNYEHAYNQITWGT LGCSYPRARTR IARSQFYVCPRDGRS LSEARRCGGLES L 160

PC006\_v2\_3\_comp1\_c0\_seq7 161 YCKEWGCETAGTAYWQPRSSWDLITVVGQGHPTGTCERTGWCNPLKIEFTEPGKRFRNWLQGRTWGLRFYVTGHPGVQLTI 240  
PC010\_v2\_3\_comp0\_c0\_seq2 161 YCKEWGCETAGTAYWQPRSSWDLITVVGQGHPTGTCERTGWCNPLKIEFTEPGKRFRNWLQGRTWGLRFYVTGHPGVQLTI 240  
ki dney\_v2\_3\_comp22\_c0\_seq1 161 YCKEWGCETAGTAYWQPRSSWDLITVVGQGHPTGTCERTGWCNPLKIEFTEPGKRFRNWLQGRTWGLRFYVTGHPGVQLTI 240  
PC009b\_v2\_3\_comp2\_c0\_seq3 161 YCKEWGCETAGTAYWQPRSSWDLITVVGQGHPTGTCERTGWCNPLKIEFTEPGKRFRNWLQGRTWGLRFYVTGHPGVQLTI 240  
PC008\_v2\_3\_comp5\_c0\_seq12 161 YCKEWGCETAGNAYWQPRSSWDLITVVGQGHPTGTCERTGWCNPLKIEFTEPGKQFRNWLQGRTWGLRFYVTGHPGVQLTI 240  
PC005\_v2\_3\_comp6\_c0\_seq3 161 YCKEWGCETAGNAYWQPRSSWDLITVVGQGHPTGTCERTGWCNPLKIEFTEPGKQFRNWLQGRTWGLRFYVTGHPGVQLTI 240

PC006\_v2\_3\_comp1\_c0\_seq7 241 RLVITSPPPVVVGPDVLAEQGPPRKIPFLPRVPVPTLSPPASPIPTVQASPPAPSTPSPTTGDRLFGLVQGAFLALNAT 320  
PC010\_v2\_3\_comp0\_c0\_seq2 241 RLVITSPPPVVVGPDVLAEQGPPRKIPFLPRVPVPTLSPPASPIPTVQASPPAPSTPSPTTGDRLFGLVQGAFLALNAT 320  
ki dney\_v2\_3\_comp22\_c0\_seq1 241 RLVITSPPPVVVGPDVLAEQGPPRKIPFLPRVPVPTLSPPASPIPTVQASPPAPSTPSPTTGDRLFGLVQGAFLALNAT 320  
PC009b\_v2\_3\_comp2\_c0\_seq3 241 RLVITSPPPVVVGPDVLAEQGPPRKIPFLPRVPVPTLSPPASPIPTVQASPPAPSTPSPTTGDRLFGLVQGAFLALNAT 320  
PC008\_v2\_3\_comp5\_c0\_seq12 241 RLVITSPPPVVVGPDVLAEQGPPRKIPFLPRVPVPTLSPPASPIPTVQASPPAPSTPSPTTGDRLFGLVQGAFLALNAT 320  
PC005\_v2\_3\_comp6\_c0\_seq3 241 RLVITSPPPVVVGPDVLAEQGPPRKIPFLPRVPVPTLSPPASPIPTVQASPPAPSTPSPTTGDRLFGLVQGAFLALNAT 320

PC006\_v2\_3\_comp1\_c0\_seq7 321 NPEATESCWLCCLALGPPYYEGIATPGQVTYASTDSQCRWGGKGLTLTEVSGLGLCIGKVPPTHQHLCNLTIPLNASHTH 400  
PC010\_v2\_3\_comp0\_c0\_seq2 321 NPEATESCWLCCLALGPPYYEGIATPGQVTYASTDSQCRWGGKGLTLTEVSGLGLCIGKVPPTHQHLCNLTIPLNASHTH 400  
ki dney\_v2\_3\_comp22\_c0\_seq1 321 NPEATESCWLCCLALGPPYYEGIATPGQVTYASTDSQCRWGGKGLTLTEVSGLGLCIGKVPPTHQHLCNLTIPLNASHTH 400  
PC009b\_v2\_3\_comp2\_c0\_seq3 321 NPEATESCWLCCLALGPPYYEGIATPGQVTYASTDSQCRWGGKGLTLTEVSGLGLCIGKVPPTHQHLCNLTIPLNASHTH 400  
PC008\_v2\_3\_comp5\_c0\_seq12 321 NPEATESCWLCCLALGPPYYEGIATPGQVTYASTDSQCRWGGKGLTLTEVSGLGLCIGKVPPTHQHLCNLTIPLNASHTH 400  
PC005\_v2\_3\_comp6\_c0\_seq3 321 NPEATESCWLCCLALGPPYYEGIATPGQVTYASTDSQCRWGGKGLTLTEVSGLGLCIGKVPPTHQHLCNLTIPLNASHTH 400

PC006\_v2\_3\_comp1\_c0\_seq7 401 KYLLPSNHSWWACNSGLTPCLSTSVFNQSNDFCIQIQLVPRIYYHPDGTLLQAYESPHPRNKREPVS LTLAVLLGLGVAA 480  
PC010\_v2\_3\_comp0\_c0\_seq2 401 KYLLPSNHSWWACNSGLTPCLSTSVFNQSNDFCIQIQLVPRIYYHPDGTLLQAYESPHPRNKREPVS LTLAVLLGLGVAA 480  
ki dney\_v2\_3\_comp22\_c0\_seq1 401 KYLLPSNHSWWACNSGLTPCLSTSVFNQSNDFCIQIQLVPRIYYHPDGTLLQAYESPHPRNKREPVS LTLAVLLGLGVAA 480  
PC009b\_v2\_3\_comp2\_c0\_seq3 401 KYLLPSNHSWWACNSGLTPCLSTSVFNQSNDFCIQIQLVPRIYYHPDGTLLQAYESPHPRNKREPVS LTLAVLLGLGVAA 480  
PC008\_v2\_3\_comp5\_c0\_seq12 401 KYLLPSNHSWWACNSGLTPCLSTSVFNQSNDFCIQIQLVPRIYYHPDGTLLQAYESPHPRNKREPVS LTLAVLLGLGVAA 480  
PC005\_v2\_3\_comp6\_c0\_seq3 401 KYLLPSNHSWWACNSGLTPCLSTSVFNQSNDFCIQIQLVPRIYYHPDGTLLQAYESPHPRNKREPVS LTLAVLLGLGVAA 480

PC006\_v2\_3\_comp1\_c0\_seq7 481 GIGTGSTALIKGPIDLQQGLTSLQIAMDTDLRALQDSISKLEDSLTSLSSEVVLQNRRLD LFLKEGGLCAALKEECCFY 560  
PC010\_v2\_3\_comp0\_c0\_seq2 481 GIGTGSTALIKGPIDLQQGLTSLQIAMDTDLRALQDSISKLEDSLTSLSSEVVLQNRRLD LFLKEGGLCAALKEECCFY 560  
ki dney\_v2\_3\_comp22\_c0\_seq1 481 GIGTGSTALIKGPIDLQQGLTSLQIAMDTDLRALQDSISKLEDSLTSLSSEVVLQNRRLD LFLKEGGLCAALKEECCFY 560  
PC009b\_v2\_3\_comp2\_c0\_seq3 481 GIGTGSTALIKGPIDLQQGLTSLQIAMDTDLRALQDSISKLEDSLTSLSSEVVLQNRRLD LFLKEGGLCAALKEECCFY 560  
PC008\_v2\_3\_comp5\_c0\_seq12 481 GIGTGSTALIKGPIDLQQGLTSLQIAMDTDLRALQDSISKLEDSLTSLSSEVVLQNRRLD LFLKEGGLCAALKEECCFY 560  
PC005\_v2\_3\_comp6\_c0\_seq3 481 GIGTGSTALIKGPIDLQQGLTSLQIAMDTDLRALQDSISKLEDSLTSLSSEVVLQNRRLD LFLKEGGLCAALKEECCFY 560

PC006\_v2\_3\_comp1\_c0\_seq7 561 VDHS GAVRDSMRRLKERLDKRQLEHQKNLSWYEGWFNRSPWLTTLLSALAGP LLLLLLLLT LGPCVINKLVQFINDRVSA 640  
PC010\_v2\_3\_comp0\_c0\_seq2 561 VDHS GAVRDSMRRLKERLDKRQLEHQKNLSWYEGWFNRSPWLTTLLSALAGP LLLLLLLLT LGPCVINKLVQFINDRVSA 640  
ki dney\_v2\_3\_comp22\_c0\_seq1 561 VDHS GAVRDSMRRLKERLDKRQLEHQKNLSWYEGWFNRSPWLTTLLSALAGP LLLLLLLLT LGPCVINKLVQFINDRVSA 640  
PC009b\_v2\_3\_comp2\_c0\_seq3 561 VDHS GAVRDSMRRLKERLDKRQLEHQKNLSWYEGWFNRSPWLTTLLSALAGP LLLLLLLLT LGPCVINKLVQFINDRVSA 640  
PC008\_v2\_3\_comp5\_c0\_seq12 561 VDHS GAVRDSMRRLKERLDKRQLEHQKNLSWYEGWFNRSPWLTTLLSALAGP LLLLLLLLT LGPCVINKLVQFINDRVSA 640  
PC005\_v2\_3\_comp6\_c0\_seq3 561 VDHS GAVRDSMRRLKERLDKRQLEHQKNLSWYEGWFNRSPWLTTLLSALAGP LLLLLLLLT LGPCVINKLVQFINDRVSA 640

PC006\_v2\_3\_comp1\_c0\_seq7 641 VRILVLRHKYQTLDNEDNL 659  
PC010\_v2\_3\_comp0\_c0\_seq2 641 VRILVLRHKYQTLDNEDNL 659  
ki dney\_v2\_3\_comp22\_c0\_seq1 641 VRILVLRHKYQTLDNEDNL 659  
PC009b\_v2\_3\_comp2\_c0\_seq3 641 VRILVLRHKYQTLDNEDNL 659  
PC008\_v2\_3\_comp5\_c0\_seq12 641 VRILVLRHKYQTLDNEDNL 659  
PC005\_v2\_3\_comp6\_c0\_seq3 641 VRILVLRHKYQTLDNEDNL 659
