# Supplementary material for: A transcriptome resource for the koala (Phascolarctos cinereus): insights into koala retrovirus transcription and sequence diversity
Source: PubMed Central journal article supplement (PMC4247155; doi:10.1186/1471-2164-15-786), 2014-09-11
Supplement: 12864_2014_6686_MOESM11_ESM.pdf [file 12864_2014_6686_MOESM11_ESM.pdf]

BAN63360 1 MLLISNPRHLGHPMSPGNWKRLIILLSCVFGGAEMNQQHNNPHQPMTLTWQVLSQTGSVVWEKKAVEPPWTWWPSLEPDV 80  
lymphnode\_v2\_3\_comp821\_c0\_seq2 1 MLLISNPRHPGHPMSPGNWKRLIILLSCVFGGAEMNRQHNNPHQPMTLTWQVLSQTGSVVWEKKAVEPPWTWWPSLEPDV 80  
PC001\_v2\_3\_comp14\_c0\_seq15 1 MLLISNPRHLGHPMSPGNWKRLIILLSCVFGGAEMNQQHNNPHQPMTLTWQVLSQTGSVVWEKKAVEPPWTWWPSLEPDV 80

BAN63360 81 CALVAGLESWDIPELTASASQQARPPLYDRPWGTPGAGFTAAGWGGTLGCSYPRARI RMAMSQFYVCPRDGRSLSEARRC 160  
lymphnode\_v2\_3\_comp821\_c0\_seq2 81 CALVAGLESWDIPELTASASQQARPPLYDRPWGTPGAGFAAAGWGGTLGCSYPRARTRIAMSPFYVCPRDGRSLSEARRC 160  
PC001\_v2\_3\_comp14\_c0\_seq15 81 CALVAGLESWDIPELTASASQQARPPLYDRPWGTPGAGFAAAGWGGTLGCSYPRARTRISMSQFYVCPRDGRSLSEARRC 160

BAN63360 161 GGLES L FCKRWGCETAGTAYWQPRSSWDLITVGRGYPTGRRTCEHTGWCNPLKIEFTEPGKQS RNWLQGRTWGLRFYVTGH 240  
lymphnode\_v2\_3\_comp821\_c0\_seq2 161 GGLES LYCKE WGCETAGTAYWQPRSSWDLITVGRGHPTG - TCEHTGWCNPLKIEFTEPGKRFRNWLQGRTWGLRFYVTGH 239  
PC001\_v2\_3\_comp14\_c0\_seq15 161 GGLES LYCKK WGCETAGNAYWQPRSSWDLITVGRGHPTG - TCESTGWCNPLKIEFTEPGKQFRNWLQGRTWGLRFYVTGH 239

BAN63360 241 PGVQLTIRLVITSPPPVLLGPD SVLAEQGPPRKIPFLPRVPVPTLSPPASPIPTVQASPPAPSTPSPTTGDRLFGLVQGA 320  
lymphnode\_v2\_3\_comp821\_c0\_seq2 240 PGVQLTIRLVITSPPPVVVGPD PVLAEQGPPREIPFLPRVPVPTLSPPASPIPTVQASPPAPSTPSPTTGDRLFGLVQGA 319  
PC001\_v2\_3\_comp14\_c0\_seq15 240 PGVQLTIRLVITSPPPVGVGPD PVLAEQGPPRKIPFLPRVPVPTLSPPASPIPTVQASLPTPSTPSPTTGDRLFGLVQGA 319

BAN63360 321 FLALNATNPEATESCWLC LALGPPYYEGIATPGQVTYASTDSQCRWGGKGLTLTEVSGLG L CIGKVPPTHQHLCSLTIP 400  
lymphnode\_v2\_3\_comp821\_c0\_seq2 320 FLALNATNPEATESCWLC LALAPPYYEGIATPGQVTYASTDSQCRWGGKGLTLTEVSGLG L CIGKVPPTHQHLCNLTIP 399  
PC001\_v2\_3\_comp14\_c0\_seq15 320 FLALNATNPEATESCWLC LALGPPYYEGIATPGQVTYASTDSQCRWGGKGLTLTEVSGLG L CIGKVPPTHQHLCSLTIP 399

BAN63360 401 LNV SHTHKYLLPSNHGWWAC S SGLTPCLSTSVFNQSNDFCIQIQLVPRIYYHPDGTLLQAYESPHPRNKREPVSLTLAVL 480  
lymphnode\_v2\_3\_comp821\_c0\_seq2 400 LNASHTHKYLLPSNHSWWACNSGLTPCLSTSVFNQSNDFCIQIQLVPRIYYHPDGTLLQAYESPHPRHKREPVSLTLAVL 479  
PC001\_v2\_3\_comp14\_c0\_seq15 400 LNASHTHKYLLPSNHSWWACNSGLTPCLSTSVFNQSNDFCIQIQLVPRIYYHPDGTLLQAYESPHPRNKREPVSLTLAVL 479

BAN63360 481 LGLGVAAGIGTGSTALIKGPIDLQQGLTSLQIAMDTD LRALQDSVSKLEDSLTSLSSEVVLQNRRLD L LFLKEGGLCAAL 560  
lymphnode\_v2\_3\_comp821\_c0\_seq2 480 LGLGVAAGIGTGSTALIKGPIDLQQGLTSLQIAMDTD LRALQDSISKLEDSLTSLSSEVVLQNRRLD L LFLKEGGLCAAL 559  
PC001\_v2\_3\_comp14\_c0\_seq15 480 LGLGVAAGIGTGSTALIKGPIDLQQGLTSLQIAMDTD LRALQDSVSKLEDSLTSLSSEVVLQNRRLD L LFLKEGGLCAAL 559

BAN63360 561 KEECCFYVDHSGAVRDSMRRLKERLDKRQLEHQKNLSWYEGWFNRSPWLTTLLSALAGPLLLLLLLLLLT LGPCVINKLVQF 640  
lymphnode\_v2\_3\_comp821\_c0\_seq2 560 KEECCFYVDHSGAVRDSMRRLKERLDKRQLEHQKNLSWYEGWFNRSPWLTTLLSALAGPLLLLLLLLLLT LGPCVINKLVQF 639  
PC001\_v2\_3\_comp14\_c0\_seq15 560 KEECCFYVDHSGAVRDSMRRLKERLDKRQLEHQKNLSWYEGWFNRSPWLTTLLSALAGPLLLLLLLLLLT LGPCVINKLVQF 639

BAN63360 641 INDRVSAVRILVLRHRYQTLDNEDNL 666  
lymphnode\_v2\_3\_comp821\_c0\_seq2 640 INDRVSAVRILVLRHKYQTLDNEDNL 665  
PC001\_v2\_3\_comp14\_c0\_seq15 640 INDRVSAVRILVLRHKYQTLDNEDNL 665
