# Supplementary material for: A transcriptome resource for the koala (Phascolarctos cinereus): insights into koala retrovirus transcription and sequence diversity
Source: PubMed Central journal article supplement (PMC4247155; doi:10.1186/1471-2164-15-786), 2014-09-11
Supplement: 12864_2014_6686_MOESM12_ESM.pdf [file 12864_2014_6686_MOESM12_ESM.pdf]

|                           |     |                                                                                         |     |
|---------------------------|-----|-----------------------------------------------------------------------------------------|-----|
| PC008_v2_3_comp5_c0_seq13 | 1   | MLLISNPRHLGHPMSPGNWKRLIILLSCVFGGAEMNQQHNNPHQPMTLTWQVLSQTGSVVWEKKAVEPPWTWWPSLEPDV        | 80  |
| AGO86848                  | 1   | MLLISNPRHLGHPMSPGNWKRLIILLSCVFGGAEMNQQHNNPHQPMTLTWQVLSQTGSVVWEKKAVEPPWTWWPSLEPDV        | 80  |
| PC008_v2_3_comp5_c0_seq13 | 81  | CALVAGLESWDIPELTASDSQRPKPPGSSCGVSYSQVGRGLVRQTSYGTLCRCRCPKDRARFSGFGFYVCPRDGRTLSEAR       | 160 |
| AGO86848                  | 81  | CALAAGLETWGIPLHTAPESSQQSAPP-DGCGVLYSQVGRGLVRQS SYGTLCRCRCP RDRNR LAQSQ FYVCPRDGRS LSEAW | 159 |
| PC008_v2_3_comp5_c0_seq13 | 161 | RCGGLES LYCKE WGCETAGNAYWQPRSSWDLITVGGHPTGTCE RTGWCNPKIEFTEPGKQFRNWLQGRTWGLRFYVTG       | 240 |
| AGO86848                  | 160 | RCGGFES LYCKE WGCETTGTAYWQPRSSWDLITVGLGHPTGTCEHTGWCNPKIEFTEPGKRFRNWLQGRTWGLRFYVTG       | 239 |
| PC008_v2_3_comp5_c0_seq13 | 241 | HPGVQLTIRLVITSPPPVVVGPDPLAEQGP RKIPFLPRVPVPTLSPPASPIPTVQASPPAPSTPSPTTGDR L FGLVQG       | 320 |
| AGO86848                  | 240 | HPGVQLTIRLVITSPPPVVVGPDPLAEQGP RKIPFLPRVPVPTLSPPASPIPTVQASPPAPSTPSPTTGDR L FGLVQG       | 319 |
| PC008_v2_3_comp5_c0_seq13 | 321 | AFLALNATNPEATESCWLCLALGPPYYEGIATPGQVTYASTDSQCRWGGKGLTLTEVSGLGLCIGKVPPTHQHLC S           | 400 |
| AGO86848                  | 320 | AFLALNATNPEATESCWLCLALGPPYYEGIATPGQVTYASTDSQCRWGGKGLTLTEVSGLGLCIGKVPPTHQHLC N           | 399 |
| PC008_v2_3_comp5_c0_seq13 | 401 | PLNASHTHKYLLPSNHSWWACNSGLTPCLSTSVFNQSNDFCIQIQLVPRIYYHPDGTLLQAYESP HPRNKREPVS LTLAV      | 480 |
| AGO86848                  | 400 | PLNASHTHKYLLPSNHSWWACNSGLTPCLSTSVFNQSNDFCIQIQLVPRIYYHPDGTLLQAYESP HPRNKREPVS LTLAV      | 479 |
| PC008_v2_3_comp5_c0_seq13 | 481 | LLGLGVAAGIGTGSTALIKGPIDLQQGLTSLQIAMDTDLRALQDSISKLED SLTSLSEVVLQNRRGLDLLFLKEGGLCAA       | 560 |
| AGO86848                  | 480 | LLGLGVAAGIGTGSTALIKGPIDLQQGLTSLQIAMDTDLRALQDSVSKLENSLTSLSEVVLQNRRGLDLLFLKEGGLCAA        | 559 |
| PC008_v2_3_comp5_c0_seq13 | 561 | LKEECCFYVDHSGAVRDSMRRLKERLDKRQLEHQKNLSWYEGWFNRSPWLTTLLSALAGPLLLLLLLLLLT LGPCVINKLVQ     | 640 |
| AGO86848                  | 560 | LKEECCFYVDHSGAVRDSMRRLKERLDKRQLEHQKNLSWYEGWFNRSPWLTTLLSALAGPLLLLLLLLLLT LGPCVINKLVQ     | 639 |
| PC008_v2_3_comp5_c0_seq13 | 641 | FINDRVSAVRILVLRHKYQTLDNEDNL                                                             | 667 |
| AGO86848                  | 640 | FINDRVSAVRILVLRHKYQTLDNEDNL                                                             | 666 |
