# Supplementary material for: A transcriptome resource for the koala (Phascolarctos cinereus): insights into koala retrovirus transcription and sequence diversity
Source: BMC Genomics. 2014 Sep 11;15(1):786. doi: 10.1186/1471-2164-15-786 (PMC4247155; doi:10.1186/1471-2164-15-786)
Supplement: Supplementary file 5 — Additional file 5: Alignment of koala alpha amylase sequences. (PDF 27 KB) [file 12864_2014_6686_MOESM5_ESM.pdf]

|           |     |                           |                         |                     |             |     |
|-----------|-----|---------------------------|-------------------------|---------------------|-------------|-----|
| qm 155697 | 401 | HRWRQIRNMVIFRNVVNGEDFTNWW | NGSNQVAFGRGNKGFIVFNDDWE | LSSNLQTGLPAGTYCDVTS | SGDKSDNSCTG | 480 |
| m 71048   | 481 | QVN                       | VGSDGLAYFSISNS          | AEDPFI              | AIHVDAKL    | 512 |
| m 71055   | 481 | EIY                       | VGSSGLAYFSISNT          | AEDPFI              | AIHVDAKL    | 512 |
| m 71059   | 481 | EIY                       | VGSSGLAYFSISNT          | AEDPFI              | AIHVDAKL    | 512 |
| m 71064   | 481 | EIY                       | VGSSGLAYFSISNT          | AEDPFI              | AIHVDAKL    | 512 |
| m 71067   | 481 | QVN                       | VGSDGLAYFSISNS          | AEDPFI              | AIHVDAKL    | 512 |
| m 71077   | 481 | EIY                       | VGSSGLAYFSISNT          | AEDPFI              | AIHVDAKL    | 512 |
| m 71094   | 481 | EIY                       | VGSSGLAYFSISNT          | AEDPFI              | AIHVDAKL    | 512 |
| m 71097   | 481 | QVN                       | VGSDGLAYFSISNS          | AEDPFI              | AIHVDAKL    | 512 |
| m 71026   | 481 | EIY                       | VGSSGLAYFSISNT          | AEDPFI              | AIHVDAKL    | 512 |
| qm 155617 | 481 | QVN                       | VGSDGLAYFSISNS          | AEDPFI              | AIHVDAKL    | 512 |
| qm 155619 | 481 | EIY                       | VGSSGLAYFSISNT          | AEDPFI              | AIHVDAKL    | 512 |
| qm 155623 | 481 | EIY                       | VGSSGLAYFSISNT          | AEDPFI              | AIHVDAKL    | 512 |
| qm 155628 | 481 | QVN                       | VGSDGLAYFSISNS          | AEDPFI              | AIHVDAKL    | 512 |
| qm 155630 | 481 | QVN                       | VGSDGLAYFSISNS          | AEDPFI              | AIHVDAKL    | 512 |
| qm 155640 | 481 | QVN                       | VGSDGLAYFSISNS          | AEDPFI              | AIHVDAKL    | 512 |
| qm 155666 | 481 | EIY                       | VGSSGLAYFSISNT          | AEDPFI              | AIHVDAKL    | 512 |
| qm 155688 | 481 | EIY                       | VGSSGLAYFSISNT          | AEDPFI              | AIHVDAKL    | 512 |
| qm 155691 | 481 | QVN                       | VGSDGLAYFSISNS          | AEDPFI              | AIHVDAKL    | 512 |
